# Supplementary material for: An ontological modeling approach for abnormal states and its application in the medical domain
Source: Springer Nature journal article supplement (doi:10.1186/2041-1480-5-23), 2014-01-01

## Generic structure-dependent

## Generic abnormal states (Object -independent)

## Object-dependent Abnormal States

## Specific context (disease)-dependent Abnormal States

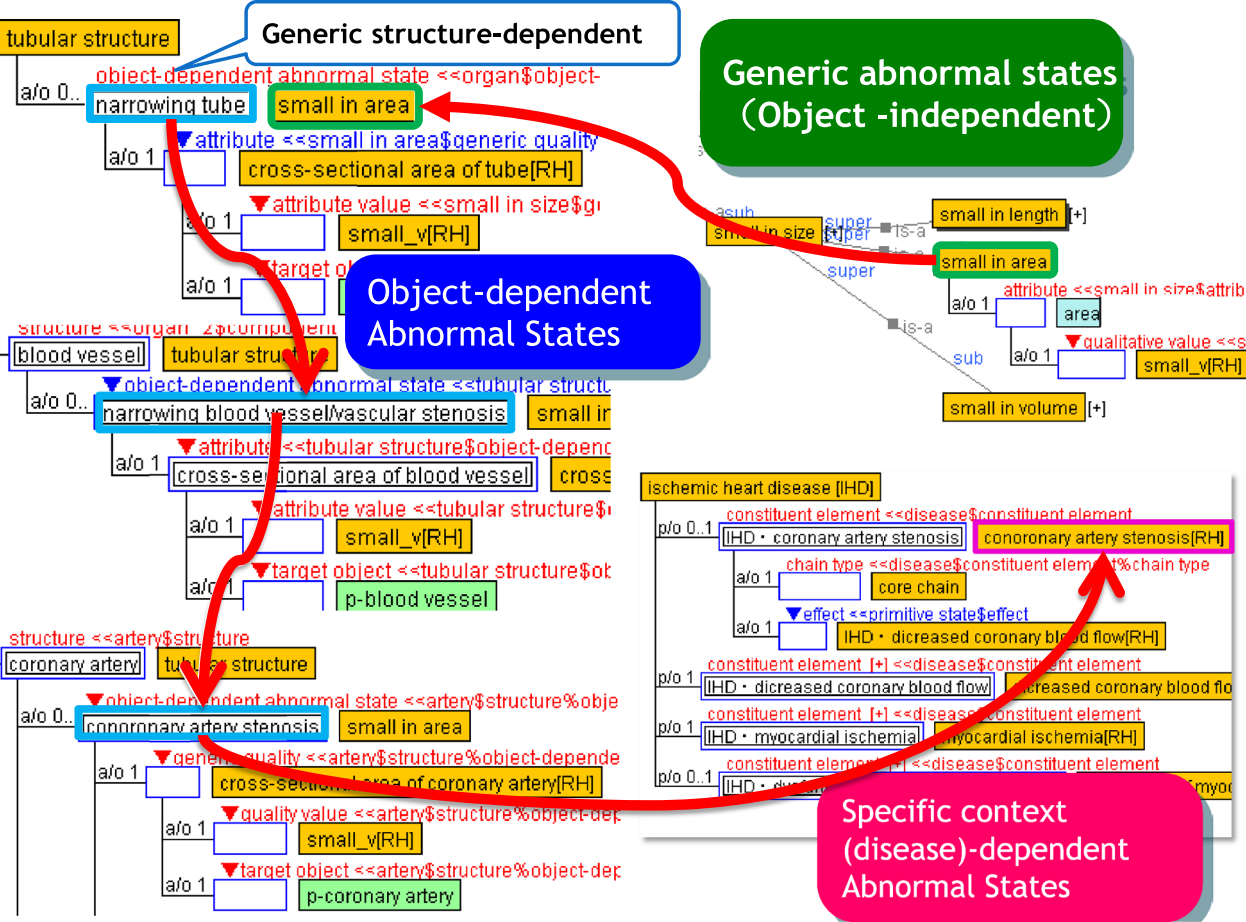

Supplement: 13326_2013_171_MOESM6_ESM.pdf [file 13326_2013_171_MOESM6_ESM.pdf]
